# Supplementary material for: IL-1β–driven osteoclastogenic Tregs accelerate bone erosion in arthritis
Source: JCI journal article supplement (doi:10.1172/jci141008), 2021-08-03
Supplement: sd1 [file 1]

**Supplemental data for:**

**IL-1 $\beta$ -driven osteoclastogenic T regulatory cells accelerate bone erosion in arthritis**

Anaïs Levescot<sup>1</sup>, Margaret H. Chang<sup>1,2</sup>, Julia Schnell<sup>1,3</sup>, Nathan Nelson-Maney<sup>1</sup>, Jing Yan<sup>1,4</sup>, Marta Martínez-Bonet<sup>1</sup>, Ricardo Grieshaber-Bouyer<sup>1</sup>, Pui Y. Lee<sup>1,2</sup>, Kevin Wei<sup>1</sup>, Rachel B. Blaustein<sup>1</sup>, Allyn Morris<sup>1</sup>, Alexandra Wactor<sup>1</sup>, Yoichiro Iwakura<sup>5</sup>, James A. Lederer<sup>6</sup>, Deepak A. Rao<sup>1</sup>, Julia F. Charles<sup>1,4</sup>, and Peter A. Nigrovic<sup>1,2</sup>

<sup>1</sup>Division of Rheumatology, Inflammation, and Immunity, Brigham and Women's Hospital, Boston MA, USA

<sup>2</sup>Division of Immunology, Boston Children's Hospital, Boston MA, USA

<sup>3</sup>Department of Medicine V, Hematology, Oncology and Rheumatology, Heidelberg University Hospital, Heidelberg, Germany

<sup>4</sup>Department of Orthopaedic Surgery, Brigham and Women's Hospital, Boston MA, USA

<sup>5</sup>Center for Experimental Animal Models, Research Institute for Science & Technology, Tokyo University of Science, Tokyo, Japan

<sup>6</sup>Department of Surgery, Brigham and Women's Hospital, Boston MA, USA

**Correspondence:**

Peter A. Nigrovic, MD  
Chief, Division of Immunology  
Boston Children's Hospital  
Karp Family Research Building, Room 10211  
One Blackfan Circle  
Boston, MA 02115  
Ph: 617-905-1373  
Email: [peter.nigrovic@childrens.harvard.edu](mailto:peter.nigrovic@childrens.harvard.edu)

All authors declare no related conflicts of interest.

**Extended Data Table 1 | Mass cytometry panels for analysis of *in vitro* differentiated Tregs**

| Synovial Panel |          |       |
|----------------|----------|-------|
| Target         | Clone    | Metal |
| pSTAT3(Y705)   | D3A7     | 169Tm |
| pSTAT1 (Y701)  | 58D6     | 160Gd |
| pSTAT5 (Y694)  | D47E7    | 174Yb |
| CD62L          | MEL-14   | 146Nd |
| Tbet           | 4B10     | 158Gd |
| CCR6           | G034E3   | 169Tm |
| CTLA-4         | UC10-4B9 | 176Yb |
| Eomes          | Dan11mag | 156Gd |
| RORgt          | AFKJS-9  | 160Gd |
| CXCR4          | L276F12  | 144Nd |
| Helios         | 22F6     | 168Er |
| CD44           | IM7      | 115In |
| CD73           | TY/11.8  | 143Nd |
| CD25           | 3C7      | 167Er |
| Foxp3          | FJK-16s  | 162Dy |
| PD-1           | 29F.1A12 | 171Yb |
| CD39           | Duha59   | 159Tb |
| CD69           | H1.2F3   | 173Yb |
| RANKL          | IK22/5   | 166Er |
| CD103          | 2E7      | 154Sm |

**Extended Data Table 2 | Mass cytometry panels for analysis of human synovial cells**

| Synovial Panel        |          |       |
|-----------------------|----------|-------|
| Target                | Clone    | Metal |
| CD45                  | HI30     | 141Pr |
| CD19                  | HIB19    | 142Nd |
| RANKL                 | MIH24    | 143Nd |
| CD64                  | 10,1     | 144Nd |
| CD16                  | 3G8      | 145Nd |
| CD8a                  | RPA T8   | 146Nd |
| FAP                   | Poly     | 147Sm |
| CD20                  | 2H7      | 148Nd |
| CD45RO                | UCHL1    | 149Sm |
| CD38                  | HIT2     | 150Nd |
| CD279/PD-1            | EH12.2H7 | 151Eu |
| CD14                  | M5E2     | 152Sm |
| CD69                  | FN50     | 153Eu |
| CD185/CXCR5           | J252D4   | 154Sm |
| CD4                   | RPA T4   | 155Gd |
| Podoplanin            | NC-08    | 156Gd |
| CD3                   | UCHT1    | 158Gd |
| CD11c                 | Bu15     | 159Tb |
| CD307d/FcRL4          | 413D12   | 160Gd |
| CD138                 | MI15     | 161Dy |
| CD90                  | 5E10     | 162Dy |
| CCR2                  | K036C2   | 163Dy |
| Cadherin 11           | 3C10     | 164Dy |
| FoxP3                 | PCH101   | 165Ho |
| CD34                  | 581      | 166Er |
| CD146/MCAM            | SHM-57   | 167Er |
| IgA                   | 9H9H11   | 168Er |
| TCRgd                 | B1       | 169Tm |
| ICOS                  | C398.4A  | 170Er |
| CD66b                 | G10F5    | 171Yb |
| IgM                   | MHM-88   | 172Yb |
| CD144/VE-<br>Cadherin | BV9      | 173Yb |
| HLA-DR                | L243     | 174Yb |
| IgD                   | IA6-2    | 175Lu |
| CD106/VCAM-1          | STA      | 176Yb |

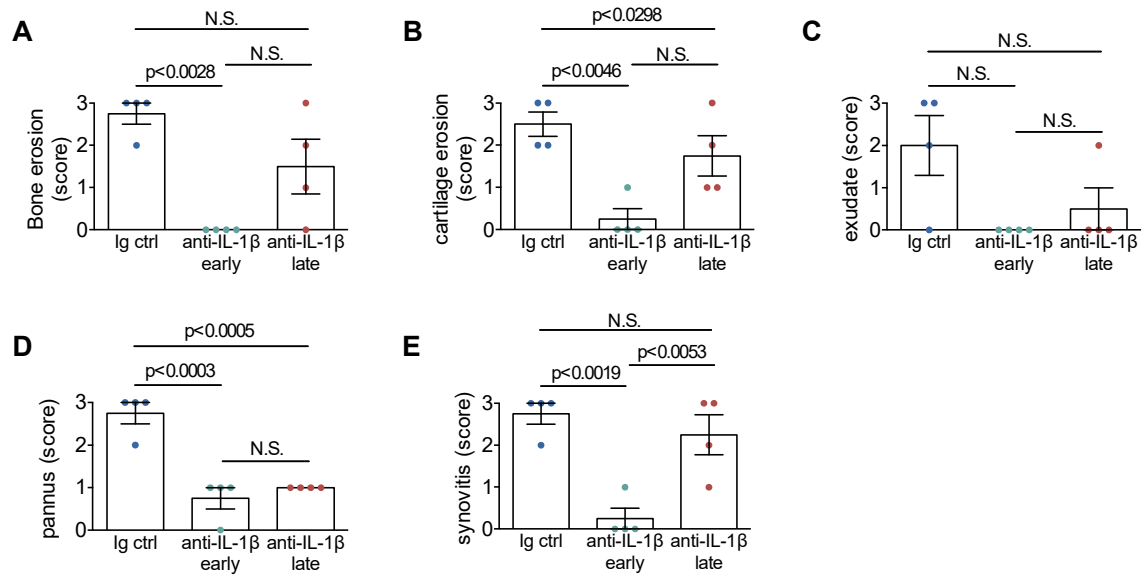

### Supplemental Figure 1

(A,E) *Il1rn*<sup>-/-</sup> mice were treated with anti-IL-1 $\beta$  or isotype-matched IgG (n=4) (5mg/kg i.p. 1 time per week) for 2 weeks either at weaning (early treatment, n=4) or 14 days after weaning (late treatment n=4). d, Histological evaluation of bone erosion in knee joints (A), cartilage erosion (B), exudate (C), pannus (D) and synovitis (E).

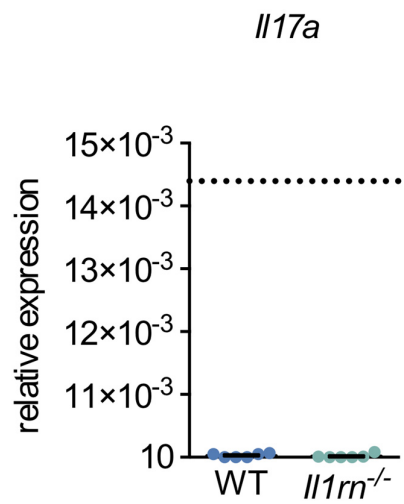

**Supplemental Figure 2**

RT-PCR of *Il17a* in sorted CD4+Foxp3eGFP+ Treg cells from WT and *Il17a*<sup>-/-</sup> mice, n=6 per group (dotted line: limit of detection).

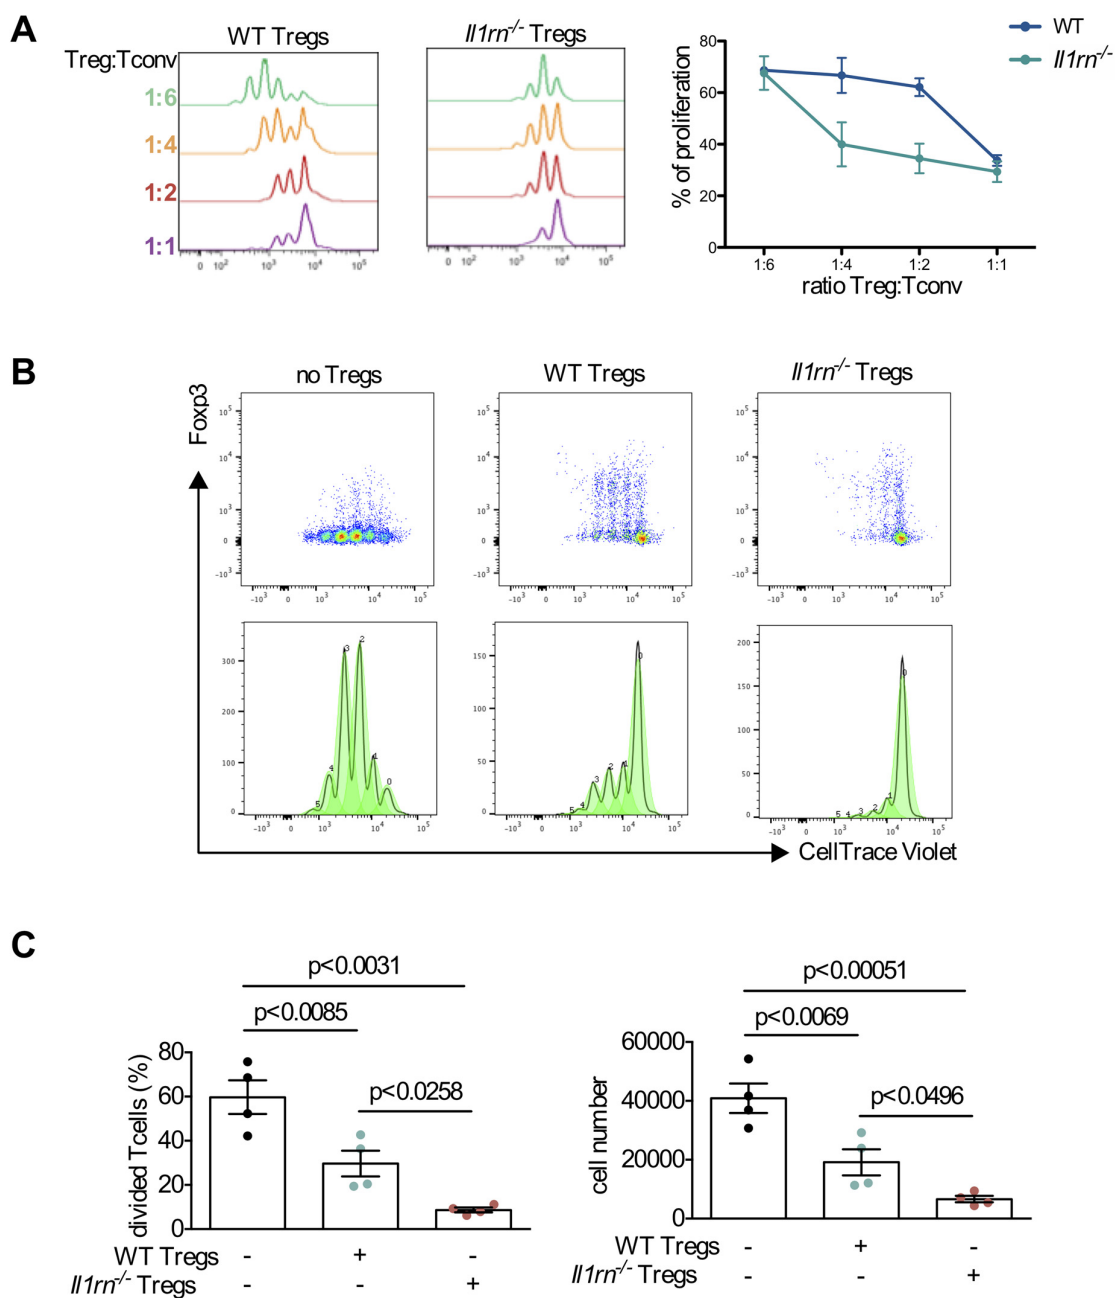

### Supplemental Figure 3

(A) Foxp3<sup>+</sup> cells from WT mice or *Il1rn*<sup>-/-</sup> mice were cocultured with WT Foxp3<sup>-</sup> cells stained with CellTrace Violet (n=4 per group). Tregs (CD3<sup>+</sup>Foxp3<sup>+</sup>) and Tconv (CD3<sup>+</sup>Foxp3<sup>-</sup>) were co-cultured in different ratios. (1:6, 1:4, 1:2, 1:1). Proliferation of WT and *Il1rn*<sup>-/-</sup> CD3<sup>+</sup>Foxp3<sup>+</sup> cells was measured following 72 h of coculture. (B,C) Tconv were stained with CellTrace Violet and cultured without Tregs, with WT Tregs or *Il1rn*<sup>-/-</sup> Tregs and CellTrace Violet staining was assayed by flow cytometry. (C) Percentage of divided Tconv and cell number after. 72h of co-culture (n=4 per group). (C) One-way ANOVA.

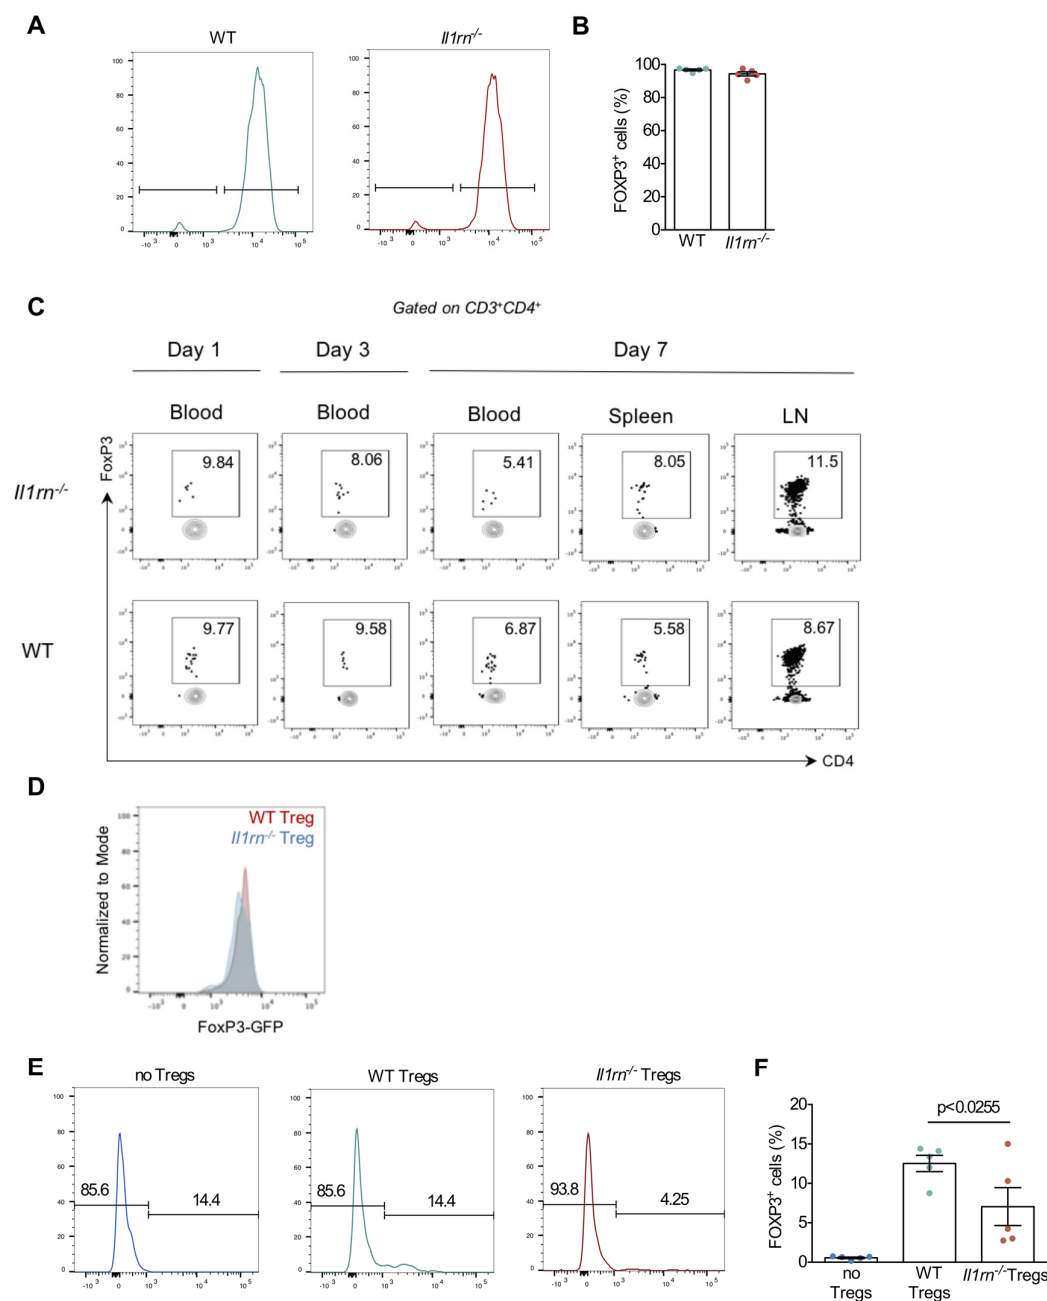

### Supplemental Figure 4

(A,B) Foxp3<sup>eGFP</sup><sup>+</sup> cells from WT and *Il1m<sup>-/-</sup>* mice were sorted and stimulated in vitro from 72h with CD3/CD28 beads. (C) T cells from FoxP3-GFP<sup>+</sup> WT or *Il1m<sup>-/-</sup>* mice were transfused into WT mice at Day 0. Representative flow cytometry plots show percentage of FoxP3<sup>+</sup> T cells in blood and tissues at various timepoints after adoptive transfer. (D) Histogram depicting FoxP3 protein expression in donor FoxP3<sup>+</sup> CD4 T cells at Day 7 after transfer. (E,F) Foxp3<sup>eGFP</sup><sup>+</sup> and Foxp3<sup>-</sup> cells stained with CellTrace Violet from WT mice or *Il1m<sup>-/-</sup>* mice were cocultured for 72h with CD3/CD28 beads. Foxp3 expression by CellTrace<sup>+</sup> cells (n=5 per group).

## Osteoclastogenic Tregs

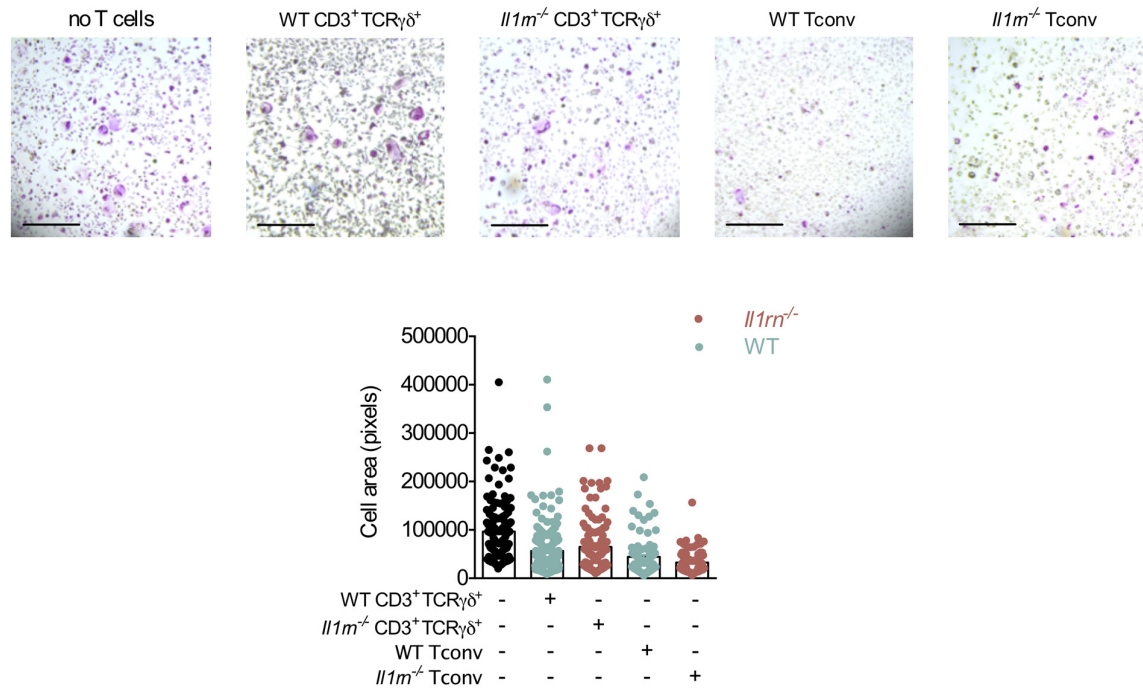

### Supplemental Figure 5

Sorted CD3<sup>+</sup>TCR $\gamma\delta$ <sup>+</sup> and CD3<sup>+</sup>FOXP3<sup>eGFP</sup>- (Tconv) from WT and *Il1m*<sup>-/-</sup> were sorted and co-cultured with macrophage precursor cells (n=4 per group). After 5 days of co-culture, cells were stained with tartrate-resistant acid phosphatase (TRAP) and TRAP<sup>+</sup> multinucleated cells were measured. Scale bar, 1mm



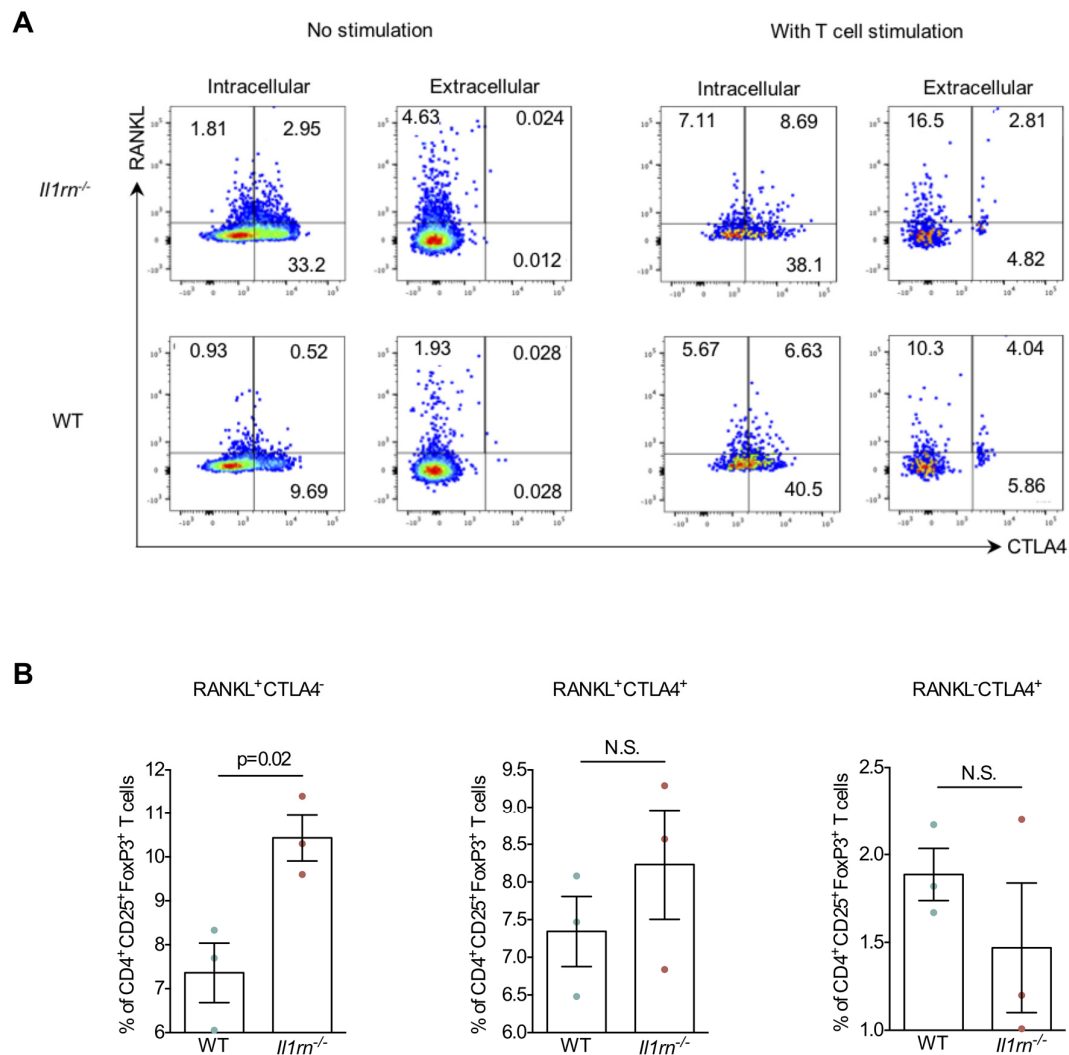

### Supplemental Figure 6

T cells purified from WT or *Il1m<sup>-/-</sup>* mice were assessed for RANKL and CTLA4 expression. T cells stimulated with anti-CD3/anti-CD28 beads for 48 hours. **(A)** Representative dot plots showing intracellular and extracellular protein expression. **(B)** RANKL and CTLA4 cell surface expression in stimulated T regs. Mann and Whitney *t* test.
